# Supplementary material for: Dantrolene Prevents the Lymphostasis Caused by Doxorubicin in the Rat Mesenteric Circulation
Source: PubMed Central journal article supplement (PMC8415554; doi:10.3389/fphar.2021.727526), 2021-08-16
Supplement: DataSheet1.pdf [file DataSheet1.pdf]

**Dantrolene prevents the lymphostasis caused by doxorubicin  
in the rat mesenteric circulation**

Serena Van<sup>1</sup>, Soumiya Pal<sup>1</sup>, Brittney R. Garner<sup>2</sup>, Kate Steed<sup>1</sup>, Vijayalakshmi Sridharan<sup>1</sup>,  
Shengyu Mu<sup>2</sup>, Nancy J. Rusch<sup>2</sup>, Amanda J. Stolarz<sup>1,2</sup>

**Supplemental Figure 1**

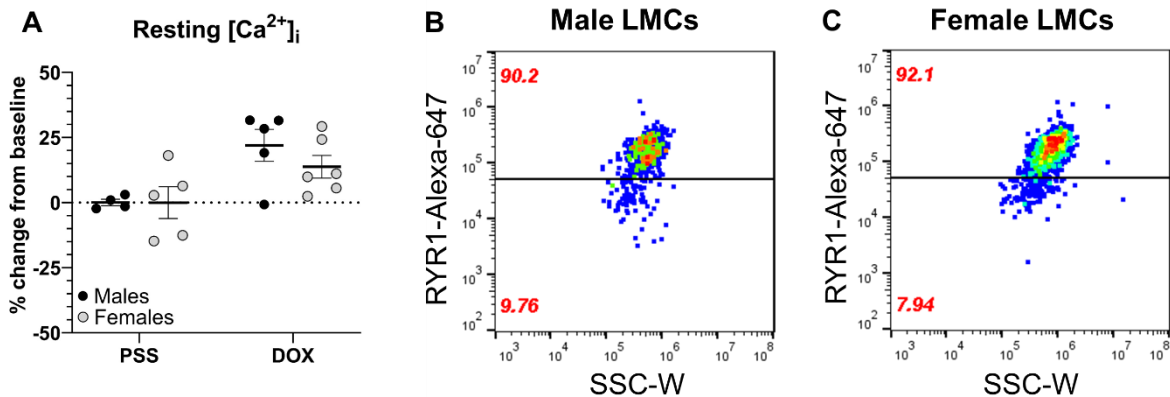

**Supplemental Figure 1: Similar response to DOX and RYR1 expression between males and females.** (A) DOX (10  $\mu$ mol/L) induced similar increases in resting [Ca<sup>2+</sup>]<sub>i</sub> at 20 mins post administration in LV isolated from males (black symbols) and female rats (grey symbols). Data presented as mean  $\pm$  S.E.M (males n=4-5, females n=5-6; p<0.05). (B-C) Scatter plots for RYR1 staining in males vs females. Gates (horizontal black line) set based on Figure 4. Similar percent of cells stained positive for RYR1 in LMCs isolated from (B) males and (C) females. Data representative of 5 isolations for each sex.
